# Supplementary material for: Sensitive detection of n -alkanes using a mixed ionization mode Proton-Transfer Reaction – Mass Spectrometer
Source: Copernicus journal article supplement (doi:10.5194/amt-2016-64), 2016-04-15
Supplement: Supplementary file 1 [file amt-2016-64-supplement.pdf]

The next graphs in figure S1 show the variability at low water flow (2 sccm) of the key source ions comprising  $\text{H}_3\text{O}^+$  ( $m/z$  19),  $\text{O}_2^+$  ( $m/z$  32),  $\text{NO}^+$  ( $m/z$  30) and  $\text{H}_2\text{O}(\text{H}_3\text{O})^+$  ( $m/z$  37) as a function of  $E/N$ . Due to excessive water clusters at low  $E/N$  found at 6 sccm (HWF), the primary ion ( $\text{H}_3\text{O}^+$ ) was saturated. The intensity of  $\text{H}_2\text{O}(\text{H}_3\text{O})^+$  decreased, when  $E/N$  increased because a de-clustering effect occur at higher electric field (Blake et al. 2009). Higher intensities were observed at low water flow for all  $n$ -alkanes. Sensitivities increased when  $\text{O}_2^+$  increased.

**a**

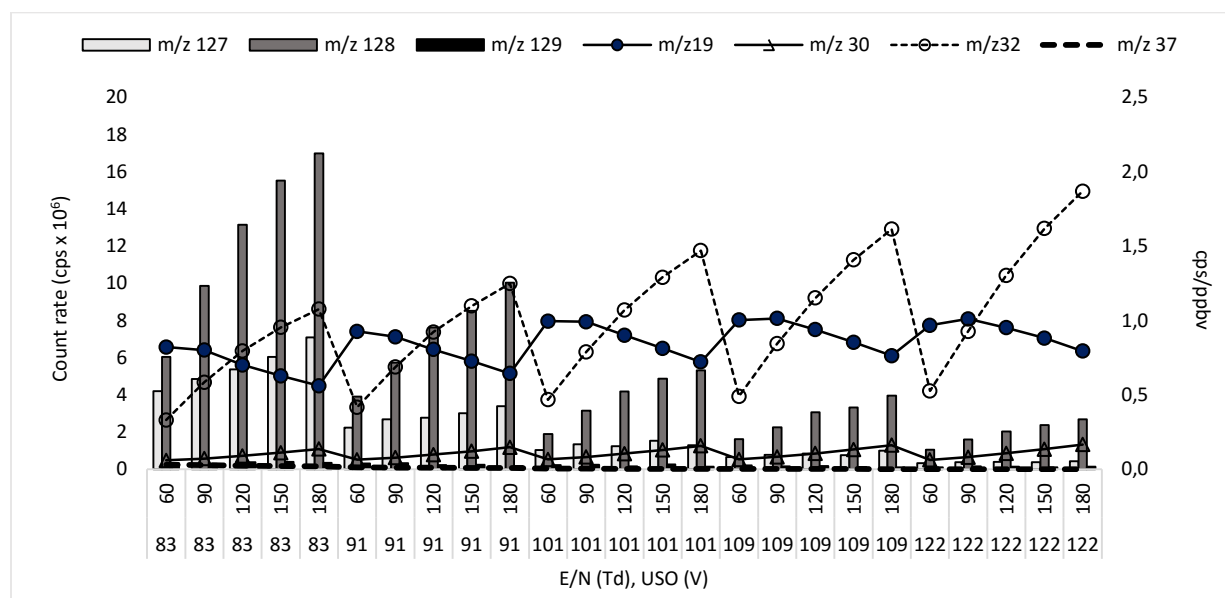

**b**

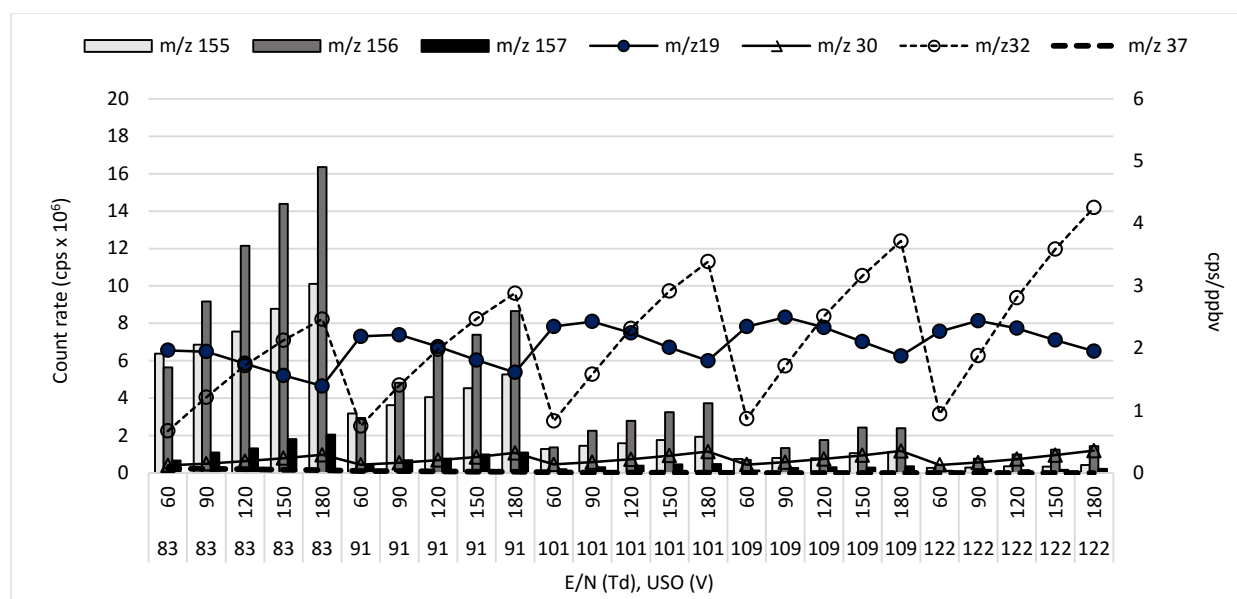

**C**

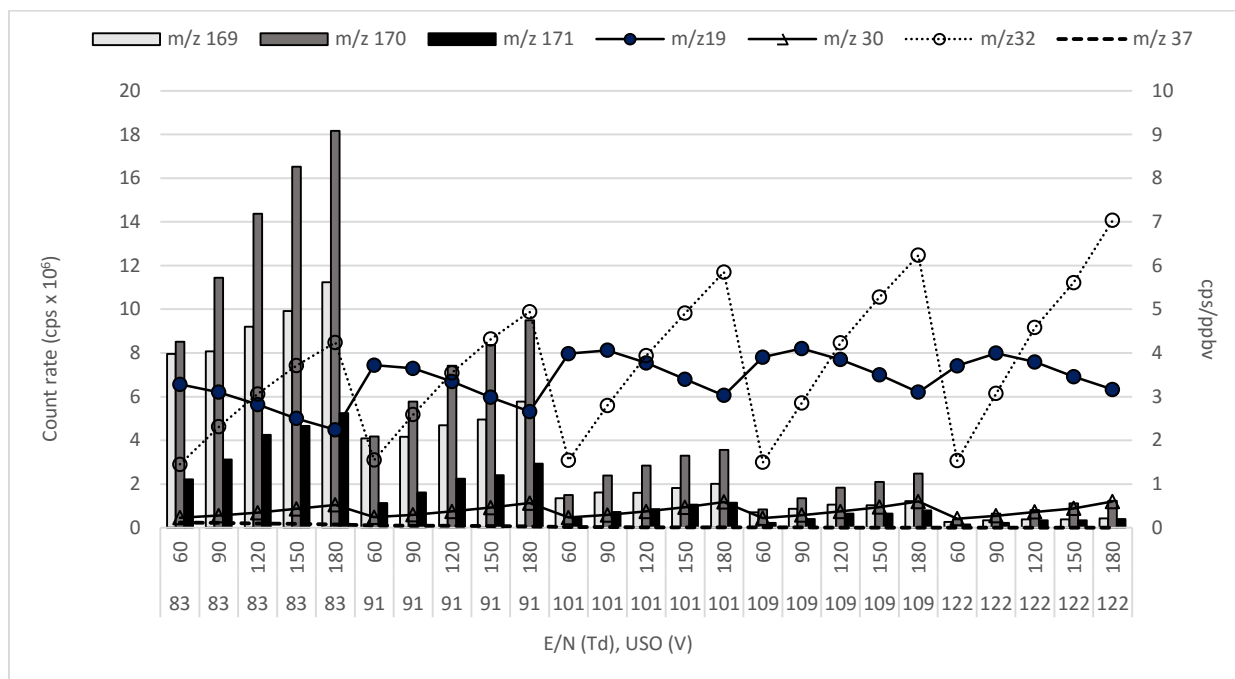

Figure S1. Intensity of signals (counts per second, cps) for  $\text{H}_3\text{O}^+$  (m/z 19),  $\text{NO}^+$  (m/z 30),  $\text{O}_2^+$  (m/z 32),  $\text{H}_2\text{O} \cdot (\text{H}_3\text{O})^+$  (m/z 37) and sensitivities (cps/ppbv) for *n*-alkanes at low water flow (2 sccm). **a.** *n*-nonane, **b.** *n*-undecane and **c.** *n*-dodecane. Data are shown for tests at five E/N ratios (83, 91, 101, 109 and 122 Td) and five  $U_{50}$  voltages (60, 90, 120, 150 and 180).

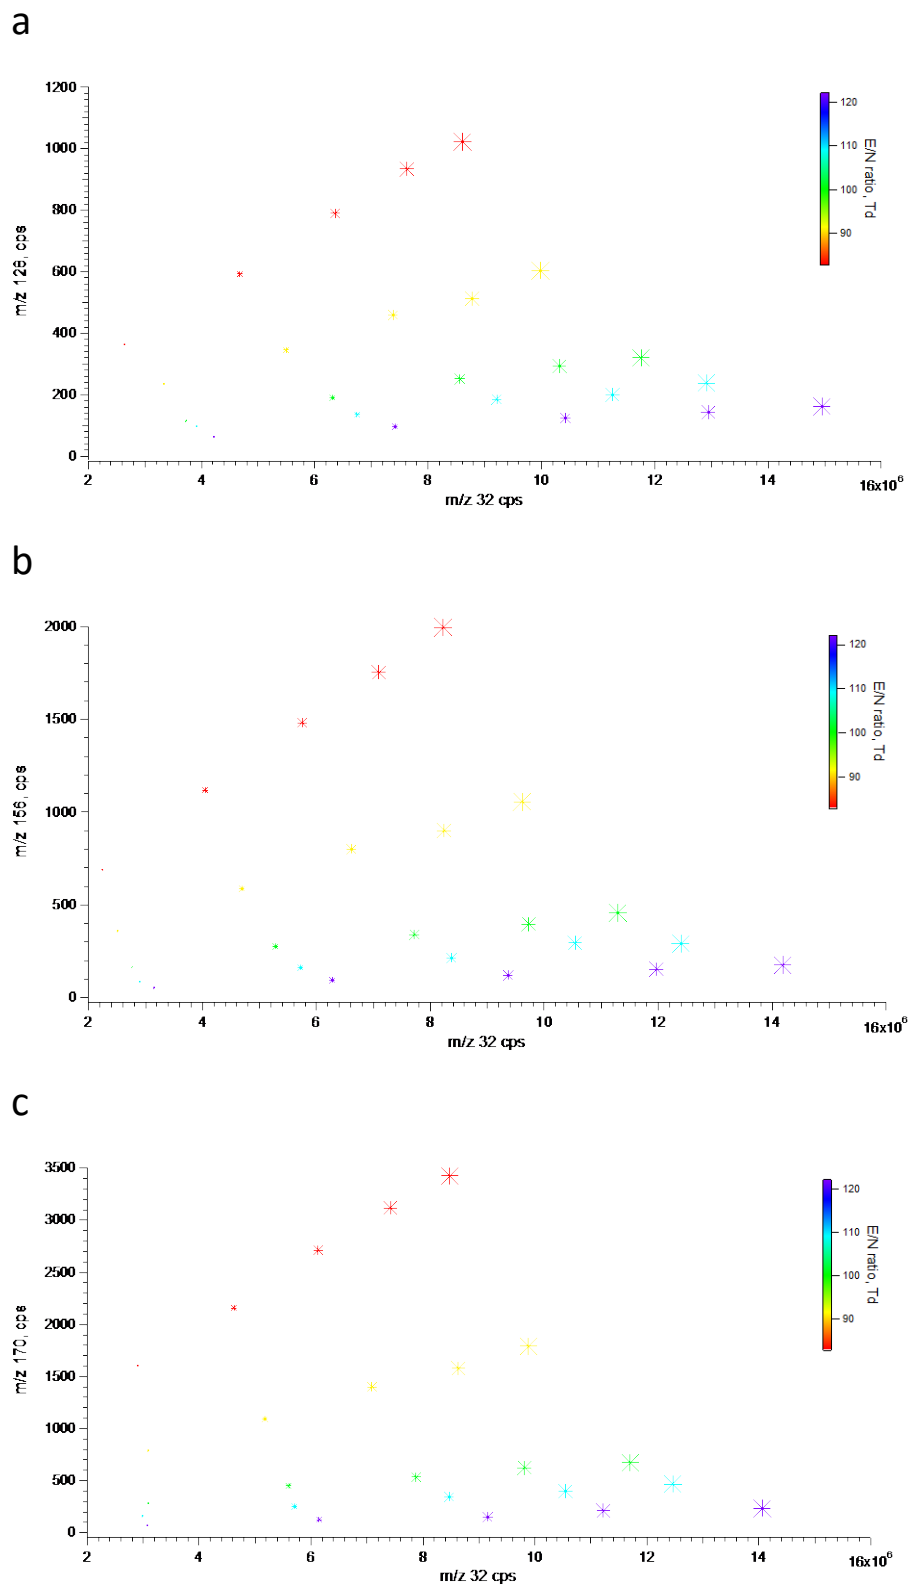

Figure S2. Intensities of  $m/z$  32 ( $O_2^+$ ) vs. intensities of charge transfer products for (a) *n*-nonane ( $m/z$  128), (b) *n*-undecane ( $m/z$  156) and (c) *n*-dodecane ( $m/z$  170). Marker size illustrates the  $U_{50}$ : Smallest 60 V and largest 180 V.

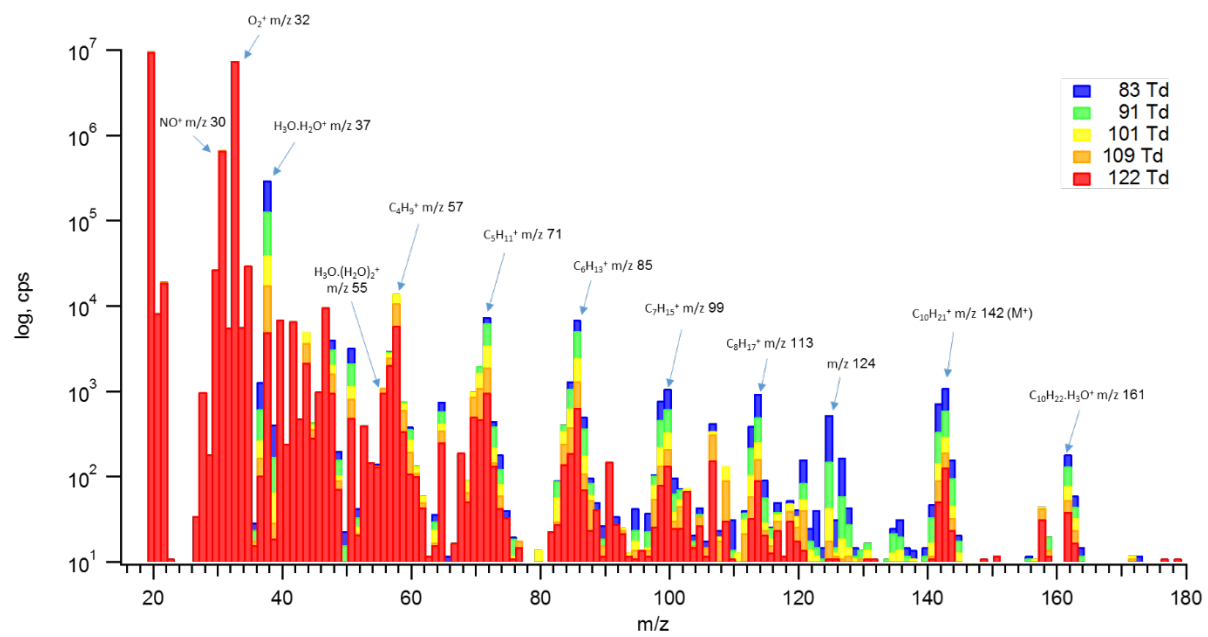

Figure S3. Mass spectra of *n*-decane. WF2, USO 60 V. E/N ratios from 83 to 122 Td.

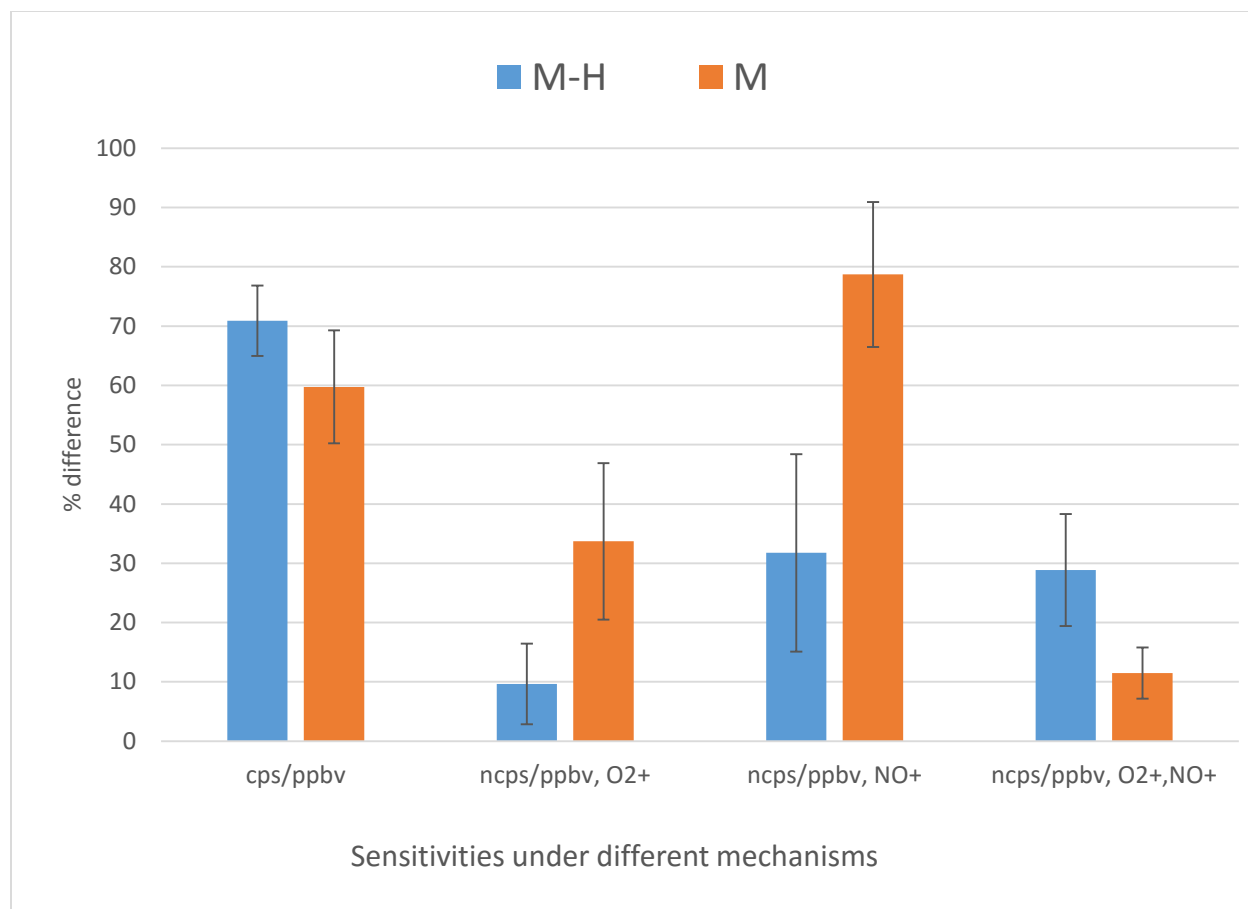

Figure S4. Difference of absolute sensitivities (cps/ppbv) and normalized sensitivities (ncps/ppbv) between two sets of experiments in percentage. Average and standard deviation (bars) including data for *n*-nonane, *n*-decane, *n*-undecane and *n*-dodecane. The dominant mechanism for these *n*-alkanes was CT.

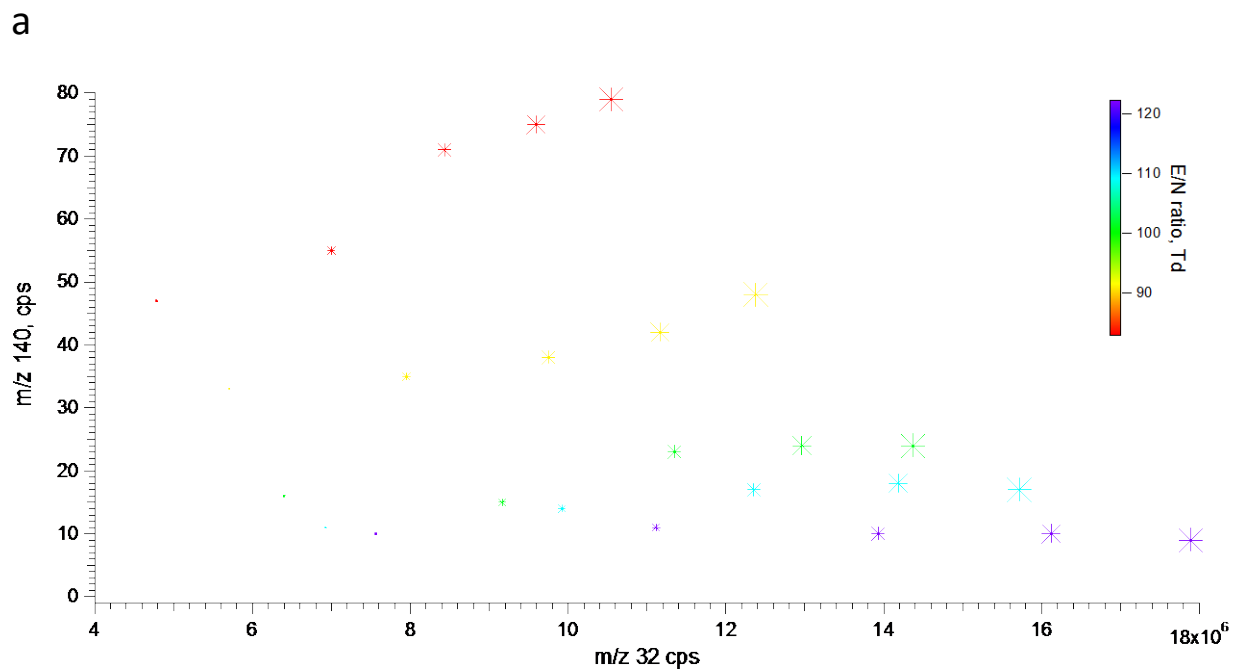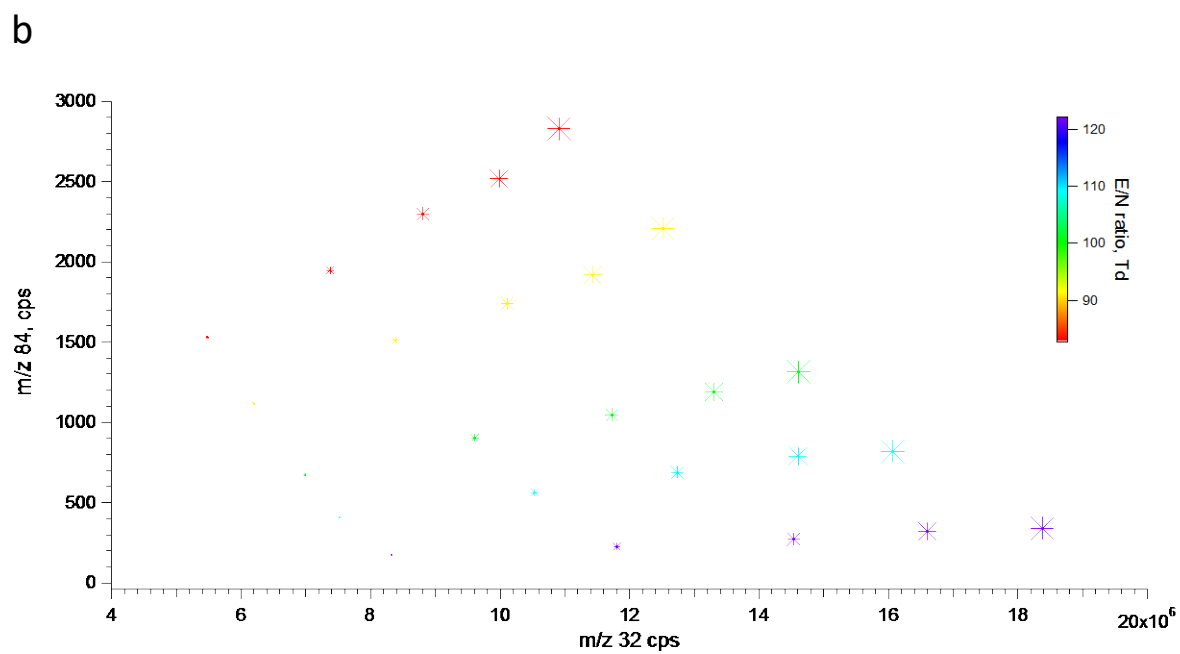

Figure S5. Intensities of double hydride abstraction for (a) *n*-decane ( $m/z$  140) and (b) *n*-hexane ( $m/z$  84) vs.  $O_2^+$  ( $m/z$  32). Marker size illustrates the  $U_{50}$ : Smallest 60 V and largest 180 V.
